# Supplementary material
Source: HighWire-hosted journal article supplement (https://le.uwpress.org/highwire/filestream/2971/field_highwire_adjunct_files/0/LE-97-2-04-Li-appA.pdf)
Supplement: LE-97-2-04-Li-appA.pdf [file LE-97-2-04-Li-appA.pdf]

# Appendices

## for "Protecting the Breadbasket with Trees? The Effect of the Great Plains Shelterbelt Project on Agriculture" by Tianshu Li

### A Additional Results

#### A.1 Heterogeneity by Different Erosion Levels

I examine the responsiveness to shelterbelt protection by different prior soil erosion levels during the 1930's Dust Bowl. The 2SLS regression results are shown in Appendix Table A.8 by four quartiles based on the fraction that was high- or medium-eroded at the county level.

Across all quartiles, it is consistent with the main results in Table 2 to have negative signs for the share of cropland in Column (1) since the 1950's and negative signs for crop revenue in Column (2) in earlier decades. However, only the results for the 2nd quartile are robust and statistically significant, which means that the counties with medium-low level of soil erosion are the most important drivers of the main results. As for the counties that were not quite suffered from the Dust Bowl in the lowest quartile, the effects of shelterbelts were limited and only statistically significant in the decrease in crop revenue in Column (2). This supports my hypothesis that this negative impact on crops is driven by the physical existence of shelterbelts impeding the adoption of subsequently appeared sprinkle irrigation appliances, irrespective of the region's low susceptibility to soil erosion. On the other hand, for the counties that were severely damaged during the Dust Bowl in the 3rd and 4th quartiles, the effects of shelterbelts were less obvious with mostly statistically insignificant results. Hence, it could be the case that the effects of shelterbelts were more indefinite for the region that had already been too damaged by wind erosion.

## A.2 Other Figures and Tables

Figure A.1: The Effect of Windbreaks on Wind Velocity

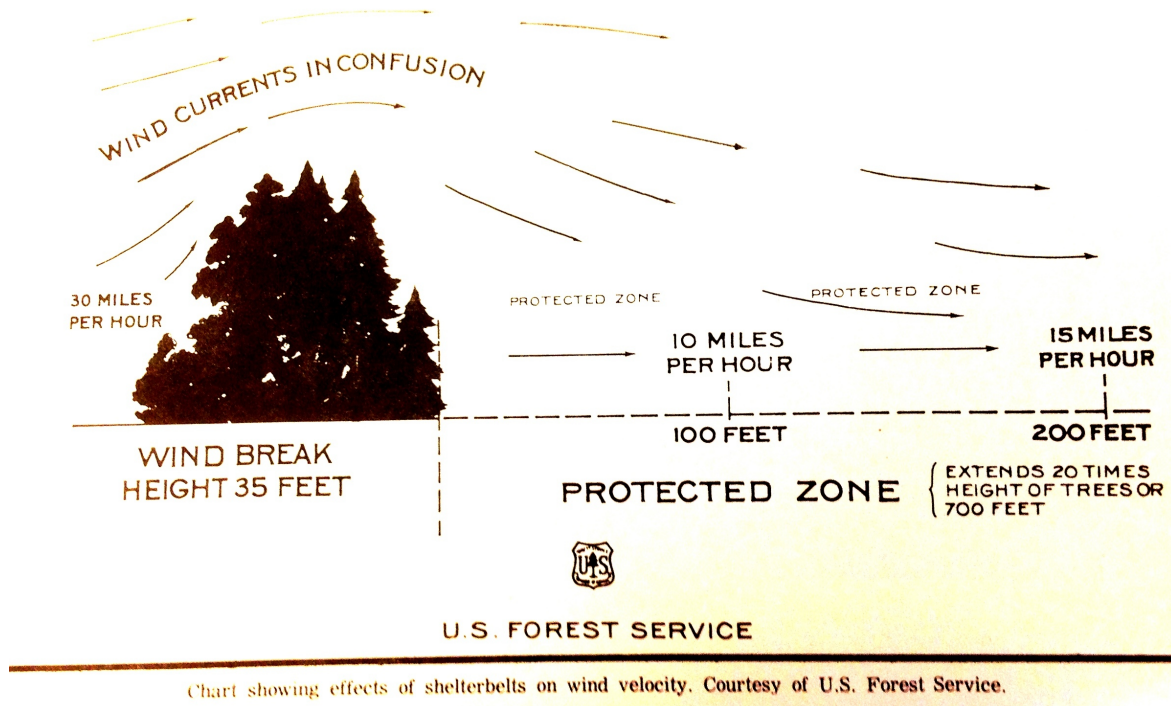

(Source: US Forest Service; "Trees, Prairies, and People: A History of Tree Planting in the Plains States" by Wilmon Henry Droze (1977))

Figure A.2: An Example of Shelterbelt Planting

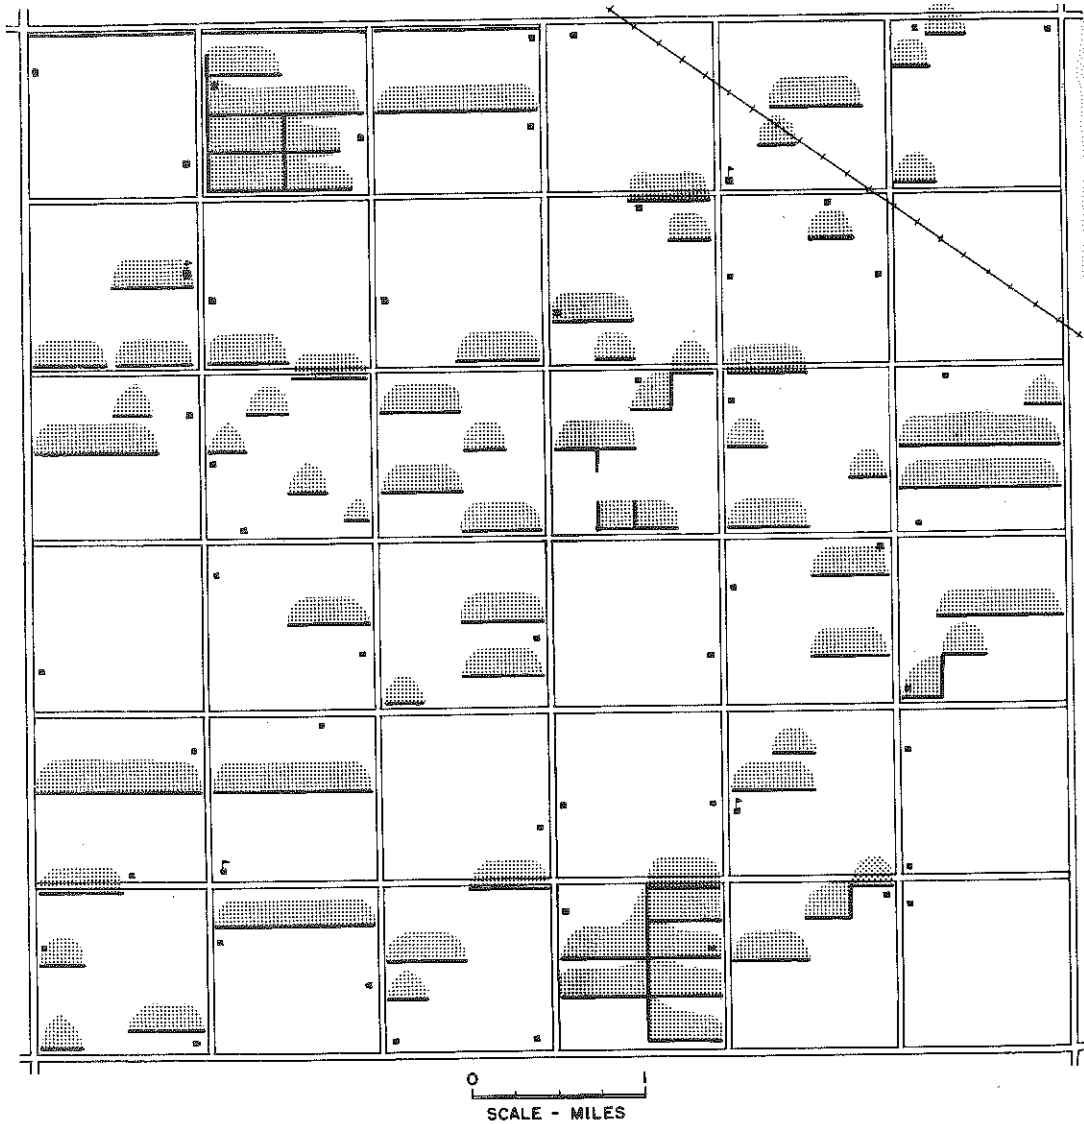

NOTE: Shaded areas show protected zone where wind velocity is reduced by 50%, assuming due south wind and 50 feet effective height.

(Source: U.S. Forest Service; "Trees, Prairies, and People: A History of Tree Planting in the Plains States" by Wilmon Henry Droze (1977))

Figure A.3: The Location of the Ogallala Aquifer and the 100-mile-wide Belt

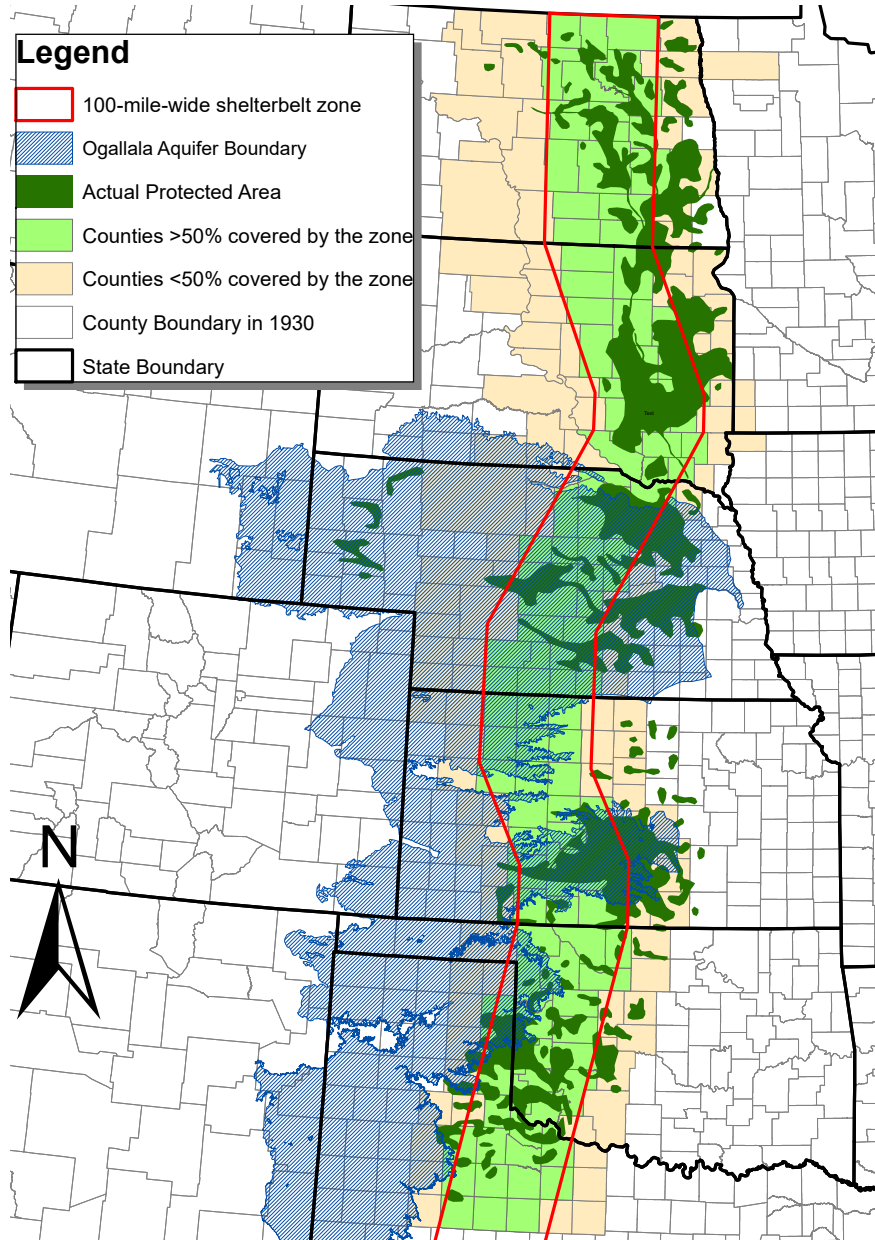

(Source: U.S. Geological Survey and U.S. Forest Service.)

Figure A.4: Designated Counties under the Great Plains Conservation Program

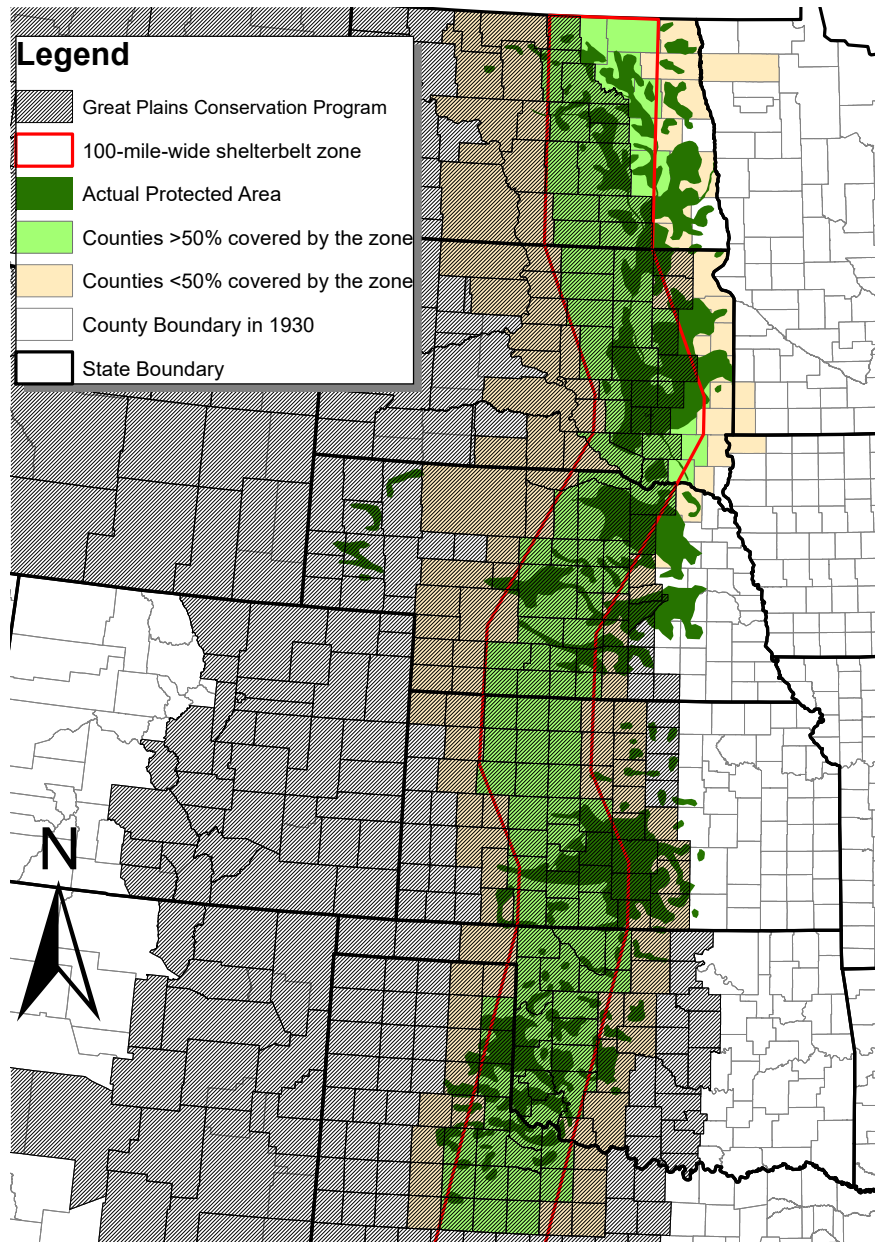

(Source: "The Great Plains conservation program", Washington, D.C.: U.S. Dept. of Agriculture, Soil Conservation Service, 1982; U.S. Forest Service.)

**Table A.1: Windbreak Removal rates from the 1975 GAO report.**

| County     | Number Standing | Number Removed | Percent Removed | Approximate Time Frame |
|------------|-----------------|----------------|-----------------|------------------------|
| Kansas     | 2,728           | 53             | 1.94            |                        |
| Clay       | 18              | -              | -               | 1957-71                |
| Pralt      | 687             | 11             | 1.60            | 1963-70                |
| Reno       | 743             | 7              | 0.94            | 1963-71                |
| Sedgwick   | 284             | 13             | 4.58            | 1963-70                |
| Stafford   | 996             | 22             | 2.21            | 1963-70                |
| Nebraska   | 4,060           | 245            | 6.03            |                        |
| Holt       | 2,117           | 165            | 7.79            | 1967-74                |
| Madison    | 1,240           | 41             | 3.31            | 1970-74                |
| Merrick    | 560             | 20             | 3.57            | 1969-73                |
| Seward     | 143             | 19             | 13.29           | 1965-70                |
| Oklahoma   | 2,520           | 547            | 21.71           |                        |
| Alfalfa    | 104             | 3              | 2.88            | 1961-73                |
| Caddo      | 413             | 84             | 20.34           | 1935-72                |
| Garfield   | 104             | 9              | 8.65            | 1961-73                |
| Cranl      | 107             | -              | -               | 1954-73                |
| Greer      | 663             | 140            | 21.12           | 1935-72                |
| Kingfisher | 263             | 10             | 3.80            | 1964-70                |
| Washita    | 866             | 301            | 34.76           | 1935-74                |
| Overall    | 9,308           | 845            | 9.08            |                        |

Source: Calculated from Orth (2004).

**Table A.2: Comparison of Treated and Control Counties in 1930 (Cutoff at 40%)**

| Variables <sup>i)</sup>                              | More Treated                                              |          |        | Less (or not) Treated                                     |          |        | Difference <sup>iii)</sup> |
|------------------------------------------------------|-----------------------------------------------------------|----------|--------|-----------------------------------------------------------|----------|--------|----------------------------|
|                                                      | Proportion within the 100-mile-wide shelterbelt zone >40% |          |        | Proportion within the 100-mile-wide shelterbelt zone <40% |          |        |                            |
|                                                      | Obs                                                       | Mean     | s.d.   | Obs                                                       | Mean     | s.d.   |                            |
| Proportion protected by shelterbelts                 | 124                                                       | 0.29     | 0.29   | 110                                                       | 0.18     | 0.28   | 0.11 *                     |
| <b>Other Right-hand-side Variables:</b>              |                                                           |          |        |                                                           |          |        |                            |
| Proportion medium-eroded <sup>ii)</sup>              | 124                                                       | 0.43     | 0.36   | 110                                                       | 0.36     | 0.33   | 0.07                       |
| Proportion high-eroded <sup>ii)</sup>                | 124                                                       | 0.19     | 0.31   | 110                                                       | 0.13     | 0.27   | 0.06                       |
| Proportion above the Ogallala Aquifer <sup>ii)</sup> | 124                                                       | 0.32     | 0.42   | 110                                                       | 0.37     | 0.45   | -0.05                      |
| Total precipitation in recent two years (mm)         | 124                                                       | 1,121.59 | 167.33 | 110                                                       | 1,110.24 | 242.79 | 11.35                      |
| Avg temperature in recent two years (°C)             | 124                                                       | 10.63    | 4.31   | 110                                                       | 9.64     | 3.99   | 0.99                       |
| Farmland/County area                                 | 124                                                       | 0.91     | 0.08   | 110                                                       | 0.89     | 0.09   | 0.02                       |
| Woodland/County area                                 | 124                                                       | 0.01     | 0.02   | 110                                                       | 0.02     | 0.04   | -0.01                      |
| Cropland/Farmland                                    | 124                                                       | 0.57     | 0.16   | 110                                                       | 0.58     | 0.18   | 0.00                       |
| Population per 1,000 Acre                            | 124                                                       | 21.27    | 11.36  | 110                                                       | 26.42    | 30.01  | -5.15                      |
| Fraction of rural population                         | 124                                                       | 0.90     | 0.16   | 110                                                       | 0.86     | 0.22   | 0.03                       |
| Fraction of farming population                       | 124                                                       | 0.62     | 0.11   | 110                                                       | 0.58     | 0.17   | 0.04 *                     |
| No. of farms/1,000 Acre                              | 124                                                       | 2.64     | 1.23   | 110                                                       | 2.63     | 1.52   | 0.01                       |
| Avg Farm Size (in Acre)                              | 124                                                       | 442.13   | 318.21 | 110                                                       | 513.88   | 471.65 | -71.75                     |
| Area of corn/Cropland                                | 124                                                       | 0.17     | 0.19   | 110                                                       | 0.17     | 0.18   | 0.00                       |
| Area of wheat/Cropland                               | 124                                                       | 0.30     | 0.27   | 110                                                       | 0.31     | 0.24   | -0.01                      |
| Area of hay/Cropland                                 | 124                                                       | 0.11     | 0.13   | 110                                                       | 0.13     | 0.14   | -0.02                      |
| Area of cotton/Cropland                              | 124                                                       | 0.13     | 0.25   | 110                                                       | 0.05     | 0.13   | 0.08 *                     |
| Area of oat, barley, and rye/Cropland                | 124                                                       | 0.12     | 0.11   | 110                                                       | 0.16     | 0.12   | -0.04 *                    |
| No. of cows/1,000 Acre                               | 124                                                       | 52.02    | 17.30  | 110                                                       | 54.18    | 24.24  | -2.16                      |
| No. pigs/1,000 Acre                                  | 124                                                       | 50.87    | 62.07  | 110                                                       | 59.42    | 77.93  | -8.55                      |
| No. of chickens/1,000 Acre                           | 124                                                       | 239.62   | 155.96 | 110                                                       | 247.92   | 193.95 | -8.30                      |

Note: i) Main data source from the USDA Census of Agriculture and Population. See Appendix B for more detailed definition of variables.

ii) Soil erosion data from Hornbeck (2012); data on the Ogallala Aquifer from Hornbeck and Keskin (2014).

iii) \* means t-test with p-value<0.05.

**Table A.3: The Effects of Shelterbelt-planting on Land Use and Revenue (OLS)**

| Variables                                         | Cropland /<br>(Cropland+Pasture) | log(Revenue from<br>Crops / Farmland) | log(Revenue from<br>Animal Products /<br>Farmland) | log(Total revenue<br>per acre) |
|---------------------------------------------------|----------------------------------|---------------------------------------|----------------------------------------------------|--------------------------------|
|                                                   | (1)                              | (2)                                   | (3)                                                | (4)                            |
| Prop. protected by shelterbelts *                 | -0.0217*                         | -0.353***                             | 0.0177                                             | -0.238***                      |
| 1945-50                                           | (0.0124)                         | (0.0770)                              | (0.0512)                                           | (0.0493)                       |
| 1954-59                                           | -0.0507***                       | -0.440***                             | 0.0620                                             | -0.232***                      |
| 1964-69                                           | (0.0163)                         | (0.109)                               | (0.0762)                                           | (0.0658)                       |
| 1978-82                                           | -0.0774***                       | -0.459***                             | 0.0814                                             | -0.193**                       |
| 1987-92                                           | (0.0193)                         | (0.116)                               | (0.111)                                            | (0.0769)                       |
|                                                   | -0.0874***                       | -0.380***                             | 0.151                                              | -0.132                         |
|                                                   | (0.0235)                         | (0.128)                               | (0.163)                                            | (0.0992)                       |
|                                                   | -0.0843***                       | -0.319**                              | 0.250                                              | -0.0724                        |
|                                                   | (0.0230)                         | (0.131)                               | (0.192)                                            | -0.114                         |
| All control variables as in Table 2 <sup>i)</sup> | Yes                              | Yes                                   | Yes                                                | Yes                            |
| Observations                                      | 2,433                            | 2,568                                 | 2,568                                              | 2,574                          |
| Number of counties                                | 234                              | 234                                   | 234                                                | 234                            |

Note: i) "All control variables as in Table 2" include proportions of high- and medium- eroded areas, Proportion above the Ogallala Aquifer, rainfall and temperature, county- and year- fixed effects, outcome variables and all the other variables listed in Table 1 from 1910-30.

ii) Standard errors clustered at county level in parentheses. \*\*\* p<0.01, \*\* p<0.05, \* p<0.1.



**Table A.4: Comparison of Other Reported Conservation Practices**

| Variable <sup>i)</sup>                                                                 | Year | More Treated<br>Proportion within the 100-mile-<br>wide shelterbelt zone >50% |         |           | Less (or not) Treated<br>Proportion within the 100-mile-<br>wide shelterbelt zone <50% |         |           | Difference <sup>ii)</sup> |
|----------------------------------------------------------------------------------------|------|-------------------------------------------------------------------------------|---------|-----------|----------------------------------------------------------------------------------------|---------|-----------|---------------------------|
|                                                                                        |      | Obs                                                                           | Mean    | Std. Dev. | Obs                                                                                    | Mean    | Std. Dev. |                           |
| <b>Panel A: Agro-Ecological Suitability Value (rainfed, low input) <sup>iii)</sup></b> |      |                                                                               |         |           |                                                                                        |         |           |                           |
| for Cereal                                                                             |      | 117                                                                           | 2.7672  | 0.7122    | 117                                                                                    | 2.8606  | 0.8520    | -0.0933                   |
| for Alfalfa                                                                            |      | 117                                                                           | 6.3541  | 1.9633    | 117                                                                                    | 6.0161  | 2.5436    | 0.3381                    |
| <b>Panel B: Other Conservation Practices <sup>iv)</sup></b>                            |      |                                                                               |         |           |                                                                                        |         |           |                           |
| Land in Strip Cropping<br>(%)                                                          | 1959 | 117                                                                           | 1.3329  | 1.8168    | 116                                                                                    | 1.9908  | 2.3236    | -0.6579 *                 |
|                                                                                        | 1964 | 117                                                                           | 1.3945  | 1.8056    | 116                                                                                    | 2.3410  | 3.1135    | -0.9465 *                 |
|                                                                                        | 1969 | 117                                                                           | 0.9452  | 1.3184    | 116                                                                                    | 1.7837  | 2.9045    | -0.8385 *                 |
| Cropland in Cover<br>Crops (%)                                                         | 1969 | 117                                                                           | 0.4204  | 0.4009    | 117                                                                                    | 0.4708  | 0.9550    | -0.0504                   |
|                                                                                        | 1978 | 111                                                                           | 1.0706  | 0.5955    | 107                                                                                    | 0.9800  | 0.5798    | 0.0906                    |
|                                                                                        | 1982 | 110                                                                           | 0.7322  | 0.4853    | 100                                                                                    | 0.6352  | 0.4231    | 0.0971                    |
|                                                                                        | 1987 | 117                                                                           | 2.4895  | 1.3794    | 115                                                                                    | 2.0768  | 1.4149    | 0.4126 *                  |
|                                                                                        | 1992 | 113                                                                           | 2.5237  | 1.4357    | 111                                                                                    | 2.2876  | 1.5295    | 0.2361                    |
| Cropland in Conservation<br>Reserve Program (%)                                        | 1987 | 106                                                                           | 1.4492  | 1.3188    | 105                                                                                    | 1.2667  | 1.1692    | 0.1825                    |
|                                                                                        | 1992 | 117                                                                           | 1.2578  | 0.6525    | 116                                                                                    | 1.2572  | 0.8211    | 0.0006                    |
| Cropland diverted under<br>Acreage Adjustment<br>Program (%)                           | 1978 | 117                                                                           | 3.8777  | 1.9746    | 117                                                                                    | 3.8580  | 2.4082    | 0.0197                    |
|                                                                                        | 1982 | 117                                                                           | 2.1071  | 1.4170    | 115                                                                                    | 1.9127  | 1.3694    | 0.1944                    |
|                                                                                        | 1987 | 106                                                                           | 7.8889  | 3.9841    | 105                                                                                    | 8.4325  | 4.7086    | -0.5437                   |
| Land in Diverted<br>Commodity Program (%)                                              | 1992 | 116                                                                           | 4.2483  | 2.7861    | 117                                                                                    | 3.5774  | 2.6847    | 0.6708                    |
| Cropland in Summer<br>Fallow (%)                                                       | 1959 | 117                                                                           | 7.5012  | 7.6154    | 117                                                                                    | 6.8438  | 7.8348    | 0.6574                    |
|                                                                                        | 1964 | 117                                                                           | 9.6763  | 9.1578    | 117                                                                                    | 9.0131  | 9.0902    | 0.6633                    |
|                                                                                        | 1969 | 117                                                                           | 11.0191 | 9.7248    | 117                                                                                    | 10.9012 | 9.6863    | 0.1179                    |
|                                                                                        | 1978 | 116                                                                           | 7.8485  | 8.2327    | 116                                                                                    | 7.8868  | 8.1849    | -0.0382                   |
|                                                                                        | 1982 | 112                                                                           | 6.6915  | 7.0554    | 111                                                                                    | 7.0035  | 7.5155    | -0.3120                   |
|                                                                                        | 1987 | 115                                                                           | 8.5998  | 7.5301    | 111                                                                                    | 9.3606  | 7.7842    | -0.7608                   |
|                                                                                        | 1992 | 110                                                                           | 5.8949  | 6.8785    | 116                                                                                    | 6.1413  | 7.0556    | -0.2463                   |

Note: i) All variables weighted by the county's farmland area.

ii) \* means t-test with p-value<0.05.

iii) Source: Global Agro-Ecological Zones by Food and Agriculture Organization of the United Nations (FAO) and the International Institute for Applied Systems Analysis (IIASA).

iv) Source: USDA Census of Agriculture. All variables in Panel B are divided by the county's farmland area for normalization.

**Table A.5: The Effects of Shelterbelt-planting Controlling New Deal Payments (2SLS)**

| Variables                                         | Cropland /<br>(Cropland+Pasture) | log(Revenue from<br>Crops / Farmland) | log(Revenue from<br>Animal Products /<br>Farmland) | log(Total revenue<br>per acre) |
|---------------------------------------------------|----------------------------------|---------------------------------------|----------------------------------------------------|--------------------------------|
|                                                   | (1)                              | (2)                                   | (3)                                                | (4)                            |
| Prop. protected by shelterbelts *                 | -0.0161                          | -0.764***                             | 0.131                                              | -0.563***                      |
| 1945-50                                           | (0.0350)                         | (0.280)                               | (0.182)                                            | (0.188)                        |
| 1954-59                                           | -0.145***                        | -1.196***                             | 0.668**                                            | -0.513**                       |
| 1964-69                                           | (0.0491)                         | (0.399)                               | (0.308)                                            | (0.209)                        |
| 1978-82                                           | -0.261***                        | -1.051***                             | 0.892**                                            | -0.0423                        |
| 1987-92                                           | (0.0648)                         | (0.385)                               | (0.423)                                            | (0.261)                        |
|                                                   | -0.324***                        | -0.777*                               | 1.264**                                            | 0.393                          |
|                                                   | (0.0788)                         | (0.397)                               | (0.591)                                            | (0.380)                        |
|                                                   | -0.302***                        | -0.600                                | 1.295**                                            | 0.472                          |
|                                                   | (0.0745)                         | (0.414)                               | (0.656)                                            | (0.431)                        |
| All control variables as in Table 2 <sup>i)</sup> | Yes                              | Yes                                   | Yes                                                | Yes                            |
| New Deal payments (1933–39) <sup>ii)</sup>        | Yes                              | Yes                                   | Yes                                                | Yes                            |
| Observations                                      | 2,433                            | 2,568                                 | 2,568                                              | 2,574                          |
| Number of counties                                | 234                              | 234                                   | 234                                                | 234                            |

Note: i) "All control variables as in Table 2" include proportions of high- and medium- eroded areas, Proportion above the Ogallala Aquifer, rainfall and temperature, county- and year- fixed effects, outcome variables and all the other variables listed in Table 1 from 1910-30.

ii) "New Deal payments (1933–39)" are per capita measures at the county level divided into five categories: payments for the Agricultural Adjustment Act, public work spending, relief spending, New Deal loans, and mortgage loans guaranteed. Per capita amount in each category is interacted with each post-treatment year dummy to account for its long-term effect. Data come from Hornbeck (2012).

iii) Standard errors clustered at county level in parentheses. \*\*\*  $p < 0.01$ , \*\*  $p < 0.05$ , \*  $p < 0.1$ .

**Table A.6: The Effects of Shelterbelt-planting and the Great Plains Conservation Program (2SLS)**

| Variables                                         | Cropland /         | log(Revenue from  | log(Revenue from  | log(Total revenue |
|---------------------------------------------------|--------------------|-------------------|-------------------|-------------------|
|                                                   | (Cropland+Pasture) | Crops / Farmland) | Animal Products / | per acre)         |
|                                                   | (1)                | (2)               | (3)               | (4)               |
| Prop. protected by shelterbelts *                 | -0.0352            | -0.820***         | 0.131             | -0.569***         |
| 1945-50                                           | (0.0313)           | (0.270)           | (0.178)           | (0.181)           |
| 1954                                              | -0.110***          | -1.158***         | 0.622**           | -0.649***         |
| 1959                                              | (0.0411)           | (0.367)           | (0.263)           | (0.231)           |
| 1964-69                                           | -0.132***          | -1.131**          | 0.730*            | -0.314            |
| 1978-82                                           | (0.0448)           | (0.485)           | (0.380)           | (0.231)           |
| 1987-92                                           | -0.217***          | -0.938**          | 0.941**           | 0.0289            |
| 1954-59                                           | (0.0514)           | (0.373)           | (0.432)           | (0.260)           |
| 1964-69                                           | -0.250***          | -0.564            | 1.117*            | 0.497             |
| 1978-82                                           | (0.0644)           | (0.390)           | (0.584)           | (0.382)           |
| 1987-92                                           | -0.241***          | -0.398            | 1.020             | 0.537             |
| 1954-59                                           | (0.0643)           | (0.405)           | (0.649)           | (0.428)           |
| GPCP Designation*                                 | -0.0188*           | -0.152            | 0.0896            | -0.00998          |
| 1959-69                                           | (0.0102)           | (0.0936)          | (0.0893)          | (0.0497)          |
| 1978-82                                           | -0.0380**          | -0.258***         | 0.356***          | -0.0417           |
| 1987-92                                           | (0.0150)           | (0.0897)          | (0.137)           | (0.0966)          |
| 1954-59                                           | -0.0471***         | -0.288***         | 0.556***          | -0.0165           |
| 1978-82                                           | (0.0161)           | (0.0934)          | (0.155)           | (0.0997)          |
| All control variables as in Table 2 <sup>i)</sup> | Yes                | Yes               | Yes               | Yes               |
| Observations                                      | 2,433              | 2,568             | 2,568             | 2,574             |
| Number of counties                                | 234                | 234               | 234               | 234               |

Note: i) "All control variables as in Table 2" include proportions of high- and medium- eroded areas, Proportion above the Ogallala Aquifer, rainfall and temperature, county- and year- fixed effects, outcome variables and all the other variables listed in Table 1 from 1910-30.

ii) Standard errors clustered at county level in parentheses. \*\*\* p<0.01, \*\* p<0.05, \* p<0.1.

**Table A.7: The Effects of Shelterbelt-planting on Labor and Capital (2SLS)**

| Variables                                             | log(Rural<br>Population Density) | log(Value of<br>Equipment per<br>Acre) | Share of Farmland<br>in the County | Share of Woodland<br>in the County |
|-------------------------------------------------------|----------------------------------|----------------------------------------|------------------------------------|------------------------------------|
|                                                       | (1)                              | (2)                                    | (3)                                | (4)                                |
| Prop. protected by shelterbelts *                     | -0.104                           | -0.437**                               | -0.0118                            | 0.0257                             |
| 1945-50                                               | (0.137)                          | (0.192)                                | (0.0618)                           | (0.0183)                           |
| 1954-59                                               | -0.109                           |                                        | 0.0108                             | 0.00617                            |
| 1964-69                                               | (0.198)                          |                                        | (0.0546)                           | (0.0131)                           |
| 1964-69                                               | -0.0941                          | -0.312*                                | -0.0103                            | 0.0148                             |
| 1978-82                                               | (0.251)                          | (0.187)                                | (0.0510)                           | (0.0109)                           |
| 1978-82                                               | -0.351                           | -0.418*                                | -0.0318                            | 0.00613                            |
| 1987-92                                               | (0.279)                          | (0.233)                                | (0.0615)                           | (0.00904)                          |
| 1987-92                                               |                                  | -0.0644                                | -0.0463                            | 0.0103                             |
|                                                       |                                  | (0.241)                                | (0.0686)                           | (0.00936)                          |
| Year and County Dummies                               | Yes                              | Yes                                    | Yes                                | Yes                                |
| Outcome Variables in 1910-30                          | Yes                              | Yes                                    | Yes                                | Yes                                |
| Other Control Variables <sup>iii)</sup>               | Yes                              | Yes                                    | Yes                                | Yes                                |
| Erosion from the Dust Bowl <sup>iii)</sup>            | Yes                              | Yes                                    | Yes                                | Yes                                |
| Proportion above the Ogallala Aquifer <sup>iii)</sup> | Yes                              | Yes                                    | Yes                                | Yes                                |
| Observations                                          | 1,170                            | 1,170                                  | 2,574                              | 2,310                              |
| Number of counties                                    | 0.866                            | 0.994                                  | 0.513                              | 0.526                              |
| R-squared                                             | 234                              | 234                                    | 234                                | 234                                |

Note: i) Data for rural population only exist decennially, and is missing for 1990.

ii) log(Value of Equipment per Acre) in Column (2) is missing in the 1950s, 1964, and the 1980s.

iii) "Other Control Variables" include rainfall and temperature for each year and all the other variables listed in Table 1 from 1910-30;

"Erosion from Dustbowl" from Hornbeck (2012) include proportions of high- and medium-eroded regions as in Table 1;

"Proportion above the Ogallala Aquifer" is from Hornbeck and Keskin (2014).

iv) Outcome variables in 1910-30, other control variables, erosion from the Dust Bowl, and proportion above the Ogallala Aquifer are all interacted with year-dummies.

**Table A.8: Heterogeneous Effects of Shelterbelt-planting by Quartiles of Wind Erosion (2SLS)**

| Variables                                   | Cropland /<br>(Cropland+Pasture) | log(Revenue from<br>Crops / Farmland) | log(Revenue from<br>Animal Products /<br>Farmland) | log(Total revenue<br>per acre) |
|---------------------------------------------|----------------------------------|---------------------------------------|----------------------------------------------------|--------------------------------|
|                                             | (1)                              | (2)                                   | (3)                                                | (4)                            |
| Prop. protected by shelterbelts             |                                  |                                       |                                                    |                                |
| x Q1 for high/medium eroded <sup>iii)</sup> | 0.0680                           | -0.947**                              | -0.145                                             | -0.640**                       |
| 1945-50                                     | (0.0743)                         | (0.451)                               | (0.295)                                            | (0.261)                        |
| 1954-59                                     | -0.0407                          | -1.505**                              | 0.224                                              | -0.572*                        |
|                                             | (0.0987)                         | (0.640)                               | (0.511)                                            | (0.294)                        |
| 1964-69                                     | -0.142                           | -0.461                                | 0.749                                              | 0.266                          |
|                                             | (0.131)                          | (0.614)                               | (0.738)                                            | (0.379)                        |
| 1978-82                                     | -0.223                           | -0.700                                | 1.995*                                             | 0.934                          |
|                                             | (0.155)                          | (0.655)                               | (1.080)                                            | (0.581)                        |
| 1987-92                                     | -0.166                           | -0.727                                | 1.909                                              | 0.977                          |
|                                             | (0.151)                          | (0.667)                               | (1.204)                                            | (0.672)                        |
| x Q2 for high/medium eroded <sup>iii)</sup> | -0.0577                          | -0.826**                              | 0.231                                              | -0.668***                      |
| 1945-50                                     | (0.0398)                         | (0.330)                               | (0.204)                                            | (0.232)                        |
| 1954-59                                     | -0.135**                         | -0.590                                | 0.828**                                            | -0.395*                        |
|                                             | (0.0584)                         | (0.387)                               | (0.369)                                            | (0.223)                        |
| 1964-69                                     | -0.228***                        | -0.288                                | 1.175**                                            | 0.268                          |
|                                             | (0.0768)                         | (0.426)                               | (0.478)                                            | (0.269)                        |
| 1978-82                                     | -0.273***                        | -0.0456                               | 1.638***                                           | 0.814**                        |
|                                             | (0.104)                          | (0.413)                               | (0.602)                                            | (0.373)                        |
| 1987-92                                     | -0.232***                        | 0.113                                 | 1.557**                                            | 0.719*                         |
|                                             | (0.0873)                         | (0.421)                               | (0.618)                                            | (0.390)                        |
| x Q3 for high/medium eroded <sup>iii)</sup> | -0.104                           | -0.699                                | 0.457                                              | -0.403                         |
| 1945-50                                     | (0.115)                          | (0.458)                               | (0.381)                                            | (0.327)                        |
| 1954-59                                     | -0.225                           | -1.036                                | 1.317*                                             | -0.268                         |
|                                             | (0.175)                          | (0.632)                               | (0.699)                                            | (0.381)                        |
| 1964-69                                     | -0.348                           | -1.544*                               | 1.402                                              | -0.138                         |
|                                             | (0.241)                          | (0.814)                               | (0.934)                                            | (0.509)                        |
| 1978-82                                     | -0.414                           | -0.832                                | 0.913                                              | 0.0954                         |
|                                             | (0.319)                          | (0.722)                               | (1.130)                                            | (0.687)                        |
| 1987-92                                     | -0.420                           | -0.573                                | 1.368                                              | 0.354                          |
|                                             | (0.281)                          | (0.741)                               | (1.339)                                            | (0.798)                        |
| x Q4 for high/medium eroded <sup>iii)</sup> | -0.158                           | -0.738                                | 0.457                                              | -0.455                         |
| 1945-50                                     | (0.175)                          | (0.613)                               | (0.494)                                            | (0.427)                        |
| 1954-59                                     | -0.336                           | -1.316                                | 1.182                                              | -0.560                         |
|                                             | (0.272)                          | (0.902)                               | (0.921)                                            | (0.509)                        |
| 1964-69                                     | -0.506                           | -2.350**                              | 1.108                                              | -0.591                         |
|                                             | (0.369)                          | (1.155)                               | (1.285)                                            | (0.710)                        |
| 1978-82                                     | -0.607                           | -1.380                                | -0.121                                             | -0.560                         |
|                                             | (0.470)                          | (1.017)                               | (1.688)                                            | (0.996)                        |
| 1987-92                                     | -0.620                           | -1.016                                | -0.0688                                            | -0.445                         |
|                                             | (0.415)                          | (1.031)                               | (1.979)                                            | (1.137)                        |
| Observations                                | 2,433                            | 2,568                                 | 2,568                                              | 2,574                          |
| Number of counties                          | 234                              | 234                                   | 234                                                | 234                            |

Note: i) All columns control for proportions of high- and medium- eroded areas, proportion above the Ogallala Aquifer rainfall and temperature, county- and year- fixed effects, outcome variables and all other variables listed in Table 1 in 1910-30

ii) Standard errors clustered at county level in parentheses. \*\*\* p<0.01, \*\* p<0.05, \* p<0.1.

iii) Quartiles are based on the total fraction of a county that was high- and medium-eroded during the Dust Bowl.

Q1 is below 16.8%; Q2 is between 16.8% and 58.2%; Q3 is between 58.2% and 99.9%; Q4 is above 99.9%.
